# Supplementary material
Source: publisher site journal article supplement (https://www.dovepress.com/article/267114)
Supplement: Supplementary file 1 [file get_supplementary_file.php]

**Supplementary Materials**


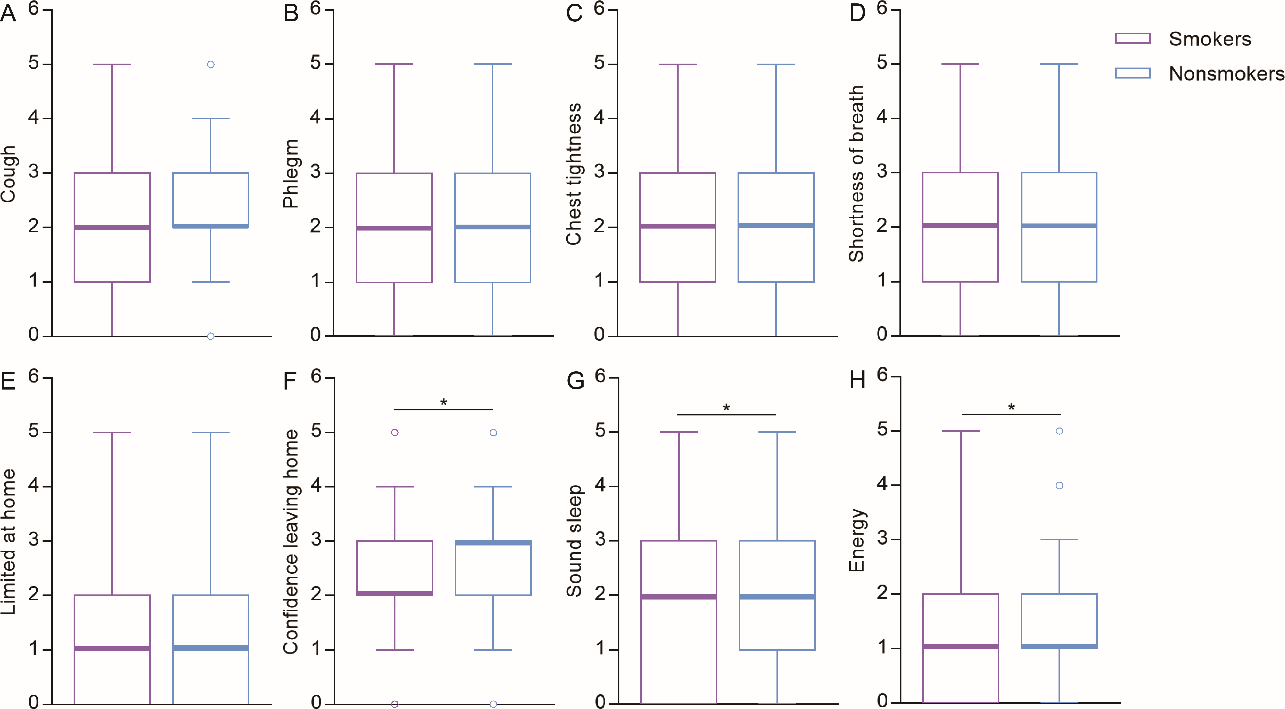


**Figure S1** CAT component scores in COPD patients with smokers and nonsmokers.

**Note:** (A) Cough. (B) Phlegm. (C) Chest tightness. (D) Shortness of breath. (E) Limited at home. (F) Confidence leaving home. (G) Sound sleep. (H) Energy**.**

**P* < 0.05;

***P* < 0.001.


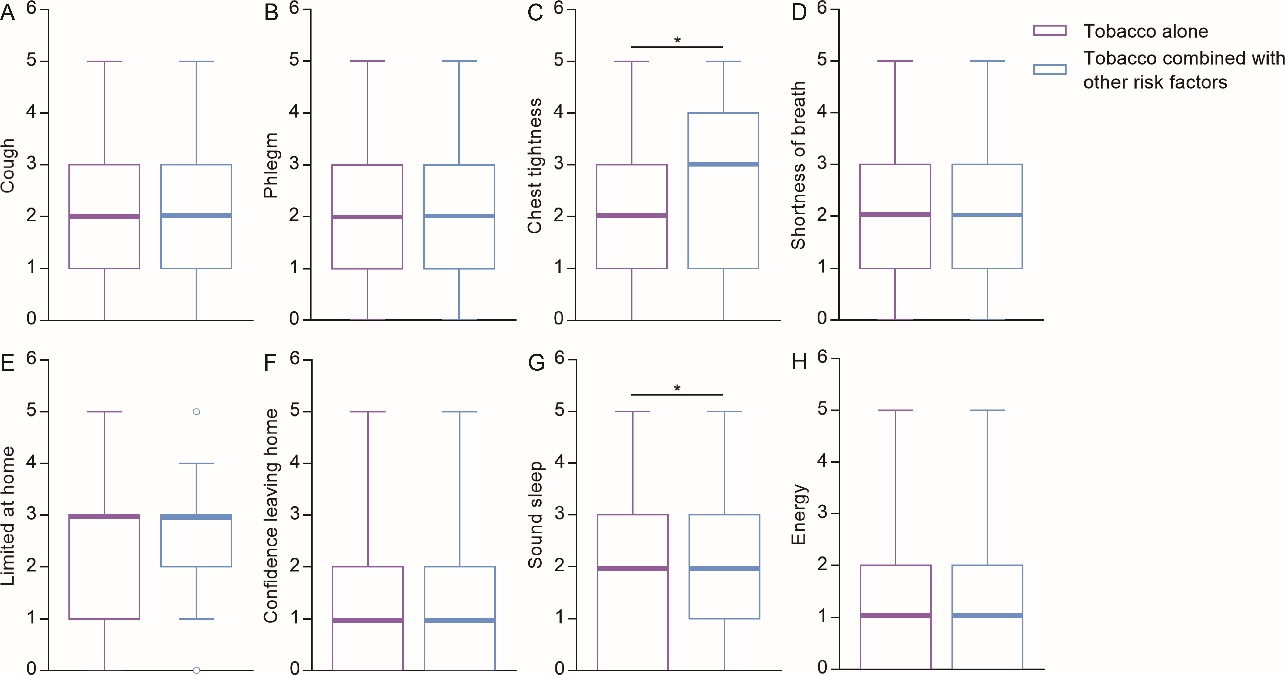


**Figure S2** CAT component scores in the subgroups of COPD patients exposed to tobacco alone and tobacco combined with other risk factors

**Note:** (A) Cough. (B) Phlegm. (C) Chest tightness. (D) Shortness of breath. (E) Limited at home. (F) Confidence leaving home. (G) Sound sleep. (H) Energy**.**

**P* < 0.05;

***P* < 0.001.

Table S1 Hospitals participating in this study

| Number | Hospital names |
| --- | --- |
| 1 | The Second Xiangya Hospital of Central South University (Hunan, China) |
| 2 | Hunan Prevention and Treatment Institute for Occupational Diseases (Hunan, China) |
| 3 | The Third Hospital of Changsha (Hunan, China) |
| 4 | The No.1 Traditional Chinese Medicine Hospital in Changde (Hunan, China) |
| 5 | The First People’s Hospital of Yueyang (Hunan, China) |
| 6 | The First People’s Hospital of Huaihua (Hunan, China) |
| 7 | Central Hospital of Xiangtan (Hunan, China) |
| 8 | Central Hospital of Hengyang (Hunan, China) |
| 9 | The Affiliated Zhuzhou Hospital of Xiangya School of Medicine CSU (Hunan, China) |
| 10 | The Second People’s Hospital of Guilin (Guangxi Zhuang Autonomous Region, China) |
| 11 | Affiliated Hospital of Guilin Medical University (Guangxi Zhuang Autonomous Region, China) |
| 12 | Guilin People’s Hospital (Guangxi Zhuang Autonomous Region, China) |

Table S2. Results from Generalized Linear Mixed Models for the association between smokers and nonsmokers

| Outcome | Model 1 | | Model 2 | | Model 3 | |
| --- | --- | --- | --- | --- | --- | --- |
| OR (95% CI) | *P* value | OR (95% CI) | *P* value | OR (95% CI) | *P* value |
| CAT | 1.71 (1.16, 2.52) | 0.007* | 1.60 (1.02, 2.53) | 0.042* | 1.61 (1.02, 2.54) | 0.041* |

**Notes:** Model 1 was for the comparison of smokers and nonsmokers;

Model 2 included model 1 plus the potential confounders of sex, age and education level;

Model 3 included model 2 plus the potential confounders of body mass index, marital status.

OR denotes odds ratio and CI denotes confidence interval.

**P* < 0.05.

**Abbreviations:** CAT, COPD assessment test.
